1 **Head-to-head comparison of composite and individual biomarkers to predict**  
2 **clinical benefit to PD-1 blockade in Non-Small Cell Lung Cancer**

3

4 Karlijn Hummelink<sup>1,2</sup>, Vincent van der Noort<sup>3</sup>, Mirte Muller<sup>2</sup>, Robert D. Schouten<sup>2</sup>, Michel  
5 M. van den Heuvel<sup>2,4</sup>, Daniela S. Thommen<sup>5</sup>, Egbert F. Smit<sup>2,6</sup>, Gerrit A. Meijer<sup>1</sup> and Kim  
6 Monkhorst<sup>1</sup>

7

8 <sup>1</sup>Department of Pathology, Division of Diagnostic Oncology, <sup>2</sup>Department of Thoracic Oncology,  
9 Division of Medical Oncology, <sup>3</sup>Department of Biometrics, Netherlands Cancer Institute, Amsterdam,  
10 The Netherlands, <sup>4</sup>Current address: Department of Pulmonary Diseases, Radboud University Medical  
11 Center, Nijmegen, The Netherlands, <sup>5</sup>Division of Molecular Oncology and Immunology, Netherlands  
12 Cancer Institute, Amsterdam, The Netherlands, <sup>6</sup>Current address: Department of Pulmonary  
13 Diseases, Leiden University Medical Center, Leiden, The Netherlands.

14

15 **Corresponding authors:**

16 Email: [k.monkhorst@nki.nl](mailto:k.monkhorst@nki.nl) (KM) and [k.hummelink@nki.nl](mailto:k.hummelink@nki.nl) (KH)

17

18

19

20

21

22

23

24

## 25 **Abstract**

### 26 Background

27 Treatment with PD-(L)1 blocking agents has demonstrated durable efficacy in advanced  
28 NSCLC, but only in a minority of patients. Multiple biomarkers for predicting treatment  
29 benefit have been investigated, but their combined performance has not been extensively  
30 studied. Here, we assess the combined predictive performance of multiple biomarkers in  
31 a series of NSCLC patients treated with nivolumab.

32

### 33 Methods

34 Pretreatment samples from 135 patients treated with nivolumab were used to assess the  
35 predictive performance of CD8 tumor-infiltrating lymphocytes (TILs), intratumoral (IT)  
36 localization of CD8 TILs, PD-1 high expressing TILs (PD1<sup>T</sup> TILs), CD3 TILs, CD20 B-  
37 cells, tertiary lymphoid structures (TLS), PD-L1 tumor proportion score (TPS) and the  
38 Tumor Inflammation score (TIS). Patients were assigned to a training (n=55) and  
39 validation set (n=80). The primary outcome measure was Disease Control at 6 months  
40 (DC 6m) and the secondary outcome measure was DC at 12 months (DC 12m).

41

### 42 Results

43 In the validation cohort, the two best performing composite biomarkers (i.e. CD8+IT-CD8  
44 and CD3+IT-CD8) demonstrated similar or lower sensitivity (64% and 83%) and NPV  
45 (76% and 85%) than the individual biomarkers PD-1<sup>T</sup> TILs and TIS (sensitivity: 72% and  
46 83%, NPV: 86% and 84%) for DC 6m, respectively. Also, at 12 months, both selected  
47 composite biomarkers (CD8+IT-CD8 and CD8+TIS) showed less predictive performance

48 compared to PD-1<sup>T</sup> TILs and TIS alone. PD-1<sup>T</sup> TILs and TIS showed high sensitivity (86%  
49 and 100%) and NPV (95% and 100%) for DC 12m. PD-1<sup>T</sup> TILs could better discriminate  
50 patients with no long-term benefit, since specificity was substantially higher as compared  
51 to TIS (74% versus 39%).

52

### 53 Conclusion

54 Composite biomarkers did not show improved predictive performance compared to PD-  
55 1<sup>T</sup> TILs and TIS alone for both the 6- and 12-months endpoint. PD-1<sup>T</sup> TILs and TIS  
56 identified patients with DC 12m with high sensitivity. Patients with no long-term benefit to  
57 PD-1 blockade were most accurately identified by PD-1<sup>T</sup> TILs.

58

59

60

61

62

63

64

65

66

67

68

69

70

## 71 **Introduction**

72       The success of monoclonal antibodies targeting the inhibitory receptor  
73 programmed cell death protein 1 (PD-1) and its ligand programmed death-ligand 1 (PD-  
74 L1) has changed the treatment landscape of advanced stage non-small cell lung cancer  
75 (NSCLC). A subset of patients treated with these PD-(L)1 blocking agents can achieve  
76 durable responses and gain a large survival benefit(1–7). Unfortunately, the majority does  
77 not derive durable clinical benefit, highlighting the need for predictive biomarkers to  
78 support treatment decision making in clinical practice. Specifically, biomarkers to exclude  
79 patients who are unlikely to benefit from PD-1 blockade therapy can offer patients  
80 alternative treatment options.

81       Tumor PD-L1 expression, as detected by immunohistochemistry (IHC), has been  
82 studied as a predictive biomarker in multiple clinical trials(8). A positive correlation  
83 between PD-L1 expression and treatment outcome has been reported in advanced stage  
84 NSCLC patients(1,5–7). However, approximately 60% to 70% of patients with PD-L1  
85 positive tumors do not respond(1,2,5). Besides this, PD-L1 assessment by IHC is  
86 hampered by intratumor heterogeneity, interassay- and interobserver variability as well  
87 as pre-analytical variation(9–14). Tumor Mutation Burden (TMB), reflecting the number  
88 of somatic mutations as a surrogate of potential tumor antigenicity, has also shown  
89 predictive potential but clinical implementation remains challenging due to the lack of a  
90 robust and predictive TMB cut-off and the technical issues that arise due to variation  
91 across platforms(15–17).

92       For these reasons there is an urgent need for biomarkers that can more accurately  
93 predict response to PD-(L)1 blockade in advanced NSCLC. Since PD-(L)1 blockade is

94 thought to reinvigorate tumor-reactive T cells(18–20), several T cell markers have been  
95 investigated. For example, the density of CD8<sup>+</sup> tumor infiltrating lymphocytes (TILs) has  
96 been correlated to response to PD-(L)1 blockade in melanoma(18), colorectal cancer(21),  
97 and NSCLC(22,23). In previous work we have shown that a distinct T cell population,  
98 termed PD-1<sup>T</sup> TILs, can predict clinical benefit in NSCLC(24,25). Notably, these PD-1<sup>T</sup>  
99 TILs predominantly localize in tertiary lymphoid structures (TLS)(24). B cells, which are a  
100 critical component of these TLS, have also been linked to response to PD-(L)1 blocking  
101 agents(26–28). Other studies developed predictive RNA expression signatures, such as  
102 the “tumor inflammation signature” (TIS), to characterize features of immune activity in  
103 the tumor microenvironment (TME)(29–31).

104 Although all of these biomarkers have shown a certain predictive potential, their  
105 accuracy is still limited which is presumably caused by multiple components that are  
106 involved in the antitumor immune response. Hence, combining biomarkers could  
107 potentially improve their predictive accuracy, as previously has been shown for the  
108 combination of TMB with PD-L1(32,33) and CD8 TILs with PD-L1(22,34). Therefore, the  
109 aim of the present study was to investigate the performance of CD8, PD-1<sup>T</sup> TILs and CD3  
110 TILs, CD20<sup>+</sup> B cells, TLS, PD-L1 and TIS as pairs of biomarkers, compared to single  
111 biomarkers, for prediction of clinical benefit to PD-1 blockade in NSCLC.

112

## 113 **Methods**

### 114 *Patients, endpoints and samples*

115 In this study, 162 patients with pathologically confirmed stage IV NSCLC were  
116 eligible for efficacy analysis. All patients started second or later line monotherapy

117 nivolumab, 3mg/kg as an IV infusion every two weeks for at least one dose, between  
118 October 2014 and August 2017 at the Netherlands Cancer Institute/Antoni van  
119 Leeuwenhoek hospital (NKI-AVL), The Netherlands. Patients with tumors harboring  
120 known sensitizing EGFR mutations or ALK translocations were excluded from treatment.  
121 Patients were randomized into a training and validation cohort. Randomization was  
122 stratified by treatment outcome at 6 months and at 12 months. Since we could only  
123 generate gene expression data in 68/162 (42%) of patients' tumors, additional  
124 stratification was done by whether mRNA expression analysis was performed or not.  
125 Stratification for missing values of other biomarkers was not performed, as the number of  
126 excluded samples per biomarker was low (range 1 to 32) (see **Supplementary Fig. S1**  
127 and later in this section).

128 Response was assessed per Response Evaluation Criteria in Solid Tumors  
129 (RECIST) version 1.1. Patients with progressive disease (PD) who were not evaluable for  
130 response were determined by the treating physician as PD. The primary clinical outcome  
131 was Disease Control (DC) (complete response (CR)/partial response (PR) or stable  
132 disease (SD)) at 6 months following initiation of treatment. DC 12m (CR/PR/SD that lasted  
133  $\geq 12$  months) was used as secondary outcome measure to predict long-term efficacy to  
134 PD-1 blockade.

135 Pretreatment formalin-fixed paraffin embedded (FFPE) tumor tissue samples were  
136 collected from all patients. Written informed consent was obtained from all patients for  
137 research usage of material not required for diagnostic use by institutionally implemented  
138 opt-out procedure. The study was conducted in accordance with the Declaration of  
139 Helsinki. The data was accessed for research purposes after the approval of the

140 Institutional Review Board (IRB) of the Netherlands Cancer Institute on January 11, 2018  
141 (CFMPB586). After K.H., M.M., R.D.S., M.M.H., E.F.S. and K.M. retrieved archived tumor  
142 samples and response data from medical records, all patients were pseudonymized. PD-  
143 1<sup>T</sup> TIL and PD-L1 tumor proportion score (TPS) data for 94 samples were used from our  
144 previous work as well as tertiary lymphoid structures (TLS) and CD20<sup>+</sup> B cell data for 91  
145 samples(25). In 27 patients, none of the biomarkers could be assessed because samples  
146 did not contain tumor tissue. In one sample no tumor tissue was left for CD8 and PD-1<sup>T</sup>  
147 TIL analysis, as well as in five samples for CD3 TIL, TLS and CD20<sup>+</sup> B cell analysis  
148 **(Supplementary Fig. S1)**. An additional number of 32 patients were excluded for PD-1<sup>T</sup>  
149 TIL analysis based on the following criteria: samples contained less than 10,000 cells  
150 (n=12), were obtained from endobronchial lesions (n=16), contained abundant normal  
151 lymphoid tissue (n=1) and showed fixation and/or staining artefacts (n=2)  
152 **(Supplementary Fig. S1)**. As described before, we excluded bronchial biopsies because  
153 they frequently showed unspecific antibody staining due to mechanical damage, and  
154 lymph node resections due to presence of PD-1<sup>+</sup> T cells in normal abundant lymphoid  
155 tissue, which could potentially lead to false positive results(25). One sample was excluded  
156 for CD8 TIL, CD3 TIL, TLS, CD20<sup>+</sup> B cell and PD-L1 analysis because of fixation/staining  
157 artefacts. One sample contained less than 2,000 cells and was excluded for CD8 TIL,  
158 CD3 TIL, TLS and CD20<sup>+</sup> B cell analysis. 67 patients (41%) were excluded for mRNA  
159 expression analysis because of low RNA yield and/or low RNA quality **(Supplementary**  
160 **Fig. S1)**.

161

162 *Immunohistochemistry*

163 CD8 immunostaining of samples was performed on a BenchMark Ultra autostainer  
164 Instrument (Ventana Medical Systems) on 3  $\mu\text{m}$  paraffin sections from FFPE blocks.  
165 Sections were initially baked at 75°C for 28 minutes and deparaffinised in the instrument  
166 with EZ prep solution (Ventana Medical Systems). Heat-induced antigen retrieval was  
167 carried out using Cell Conditioning 1 (CC1, Ventana Medical Systems) for 32 minutes.  
168 CD8 was detected using clone C8/144B (1/200 dilution, 32 minutes at 37°C,  
169 Agilent/DAKO). Bound antibody was detected using the OptiView DAB Detection Kit  
170 (Ventana Medical Systems). Slides were counterstained with Hematoxylin and Bluing  
171 Reagent (Ventana Medical Systems).

172 PD-1 immunostaining was detected using clone NAT105 (Roche Diagnostics), PD-  
173 L1 using clone 22C3 (Agilent/DAKO) and CD68 using clone KP1 (Agilent/DAKO). For the  
174 double staining CD20 (yellow) followed by CD3 (purple) we used clone L26  
175 (Agilent/DAKO) (CD20) and clone SP7 (Thermo Fisher) (CD3). All immunostainings were  
176 performed as described previously(25).

177 CD8, PD-1, PD-L1 and CD68 immunostainings were scanned at x20 magnification  
178 with a resolution of 0.50 per  $\mu\text{m}^2$  using an Aperio slide AT2 scanner (Leica Biosystems).  
179 CD20-CD3 immunostainings were scanned at x20 magnification with a resolution of 0.24  
180 per  $\mu\text{m}^2$  using a 3Dhistech P1000 scanner. PD-L1 and CD68 data were uploaded on Slide  
181 Score, a web platform for manual scoring of digital slides using a scoring sheet  
182 ([www.slidescore.com](http://www.slidescore.com)).

183

184 *Digital quantification of CD8 and PD-1<sup>T</sup> TILs*



185 Digital image analysis was performed by a trained MD (K.H.) and supervised by  
186 an experienced pathologist (K.M.) using the Multiplex IHC v1.2 module from the HALO™  
187 image analysis software, v2.3.2089.69 (Indica Labs). Researchers were blinded for  
188 clinical outcome. Classification of CD8 lymphocytes on single stains was performed using  
189 a computationally derived cut-off of 0.3 optical density (OD), which reflects the intensity  
190 of the staining. This cut-off was identified by manually optimizing the detection of CD8  
191 positive stained cells in FFPE samples. An image analysis algorithm utilizing a cut-off of  
192 0.3 OD was generated for automated analyses of CD8 lymphocytes in subsequent FFPE  
193 samples. The quantification of PD-1<sup>T</sup> TILs was performed as described previously(25).

194 The number of CD8 and PD-1<sup>T</sup> TILs per mm<sup>2</sup> tumor area were determined. Tumor  
195 areas were digitally annotated as described previously(25). PD-1<sup>T</sup> TIL data of 94 samples  
196 were used from previous work(25). For regional analysis of CD8 lymphocytes, classifiers  
197 were trained to identify stromal and tumoral regions in which the CD8 lymphocytes were  
198 quantified separately. The percentage CD8 lymphocytes in tumoral regions (i.e. intra-  
199 tumoral (IT)) compared to total CD8 TILs was calculated (**Supplementary Table S1**).

200

#### 201 *Scoring of tertiary lymphoid structures*

202 The HALO™ image analysis software, v2.3.2089.69 (Indica Labs) was used to  
203 determine the number of TLS and the combined number of TLS and lymphoid aggregates  
204 (TLS+LA) per mm<sup>2</sup> tumor area on a CD20-CD3 double immunostaining as described  
205 previously(25). TLS and TLS+LA data of 91 samples were used from previous work(25)  
206 (**Supplementary Table S1**).

207

208 *CD20 and CD3 quantification by digital image analysis*

209           The total area with CD20 expression was measured using a previously generated  
210 image analysis algorithm from the Area Quantification v1.0 module of HALO™ image  
211 analysis software (Indica Labs)(25). The same algorithm was used to measure the total  
212 area with CD3 expression. The CD20-positive and CD3-positive area were normalized  
213 per mm<sup>2</sup> tumor area. Cell numbers were not quantified as no reliable algorithm could be  
214 established due to dense clustering of CD20<sup>+</sup> or CD3<sup>+</sup> cells in and at the border of TLS.  
215 Tumor areas were digitally annotated as described previously(25). CD20 data of 91  
216 samples were used from previous work(25) (**Supplementary Table S1**).

217

218 *PD-L1 scoring*

219           PD-L1 TPS was determined using the qualitative, clinical grade LDT IHC assay  
220 (22C3 Agilent/DAKO) as described previously(25). PD-L1 TPS data of 94 samples were  
221 used from previous work(25) (**Supplementary Table S1**). The CD68 staining was  
222 compared to the PD-L1 staining to exclude macrophages that are both CD68<sup>+</sup> and PD-  
223 L1<sup>+</sup> which can introduce false positive results.

224

225 *RNA extraction and hybridization to nCounter tagset*

226           RNA of pretreatment FFPE samples from the NKI-AVL cohorts were isolated with  
227 the AllPrep DNA/RNA FFPE isolation kit (#80234, Qiagen) according to the instructions  
228 of the manufacturer and quantified by TapeStation (Agilent). 200 to 300 ng RNA were  
229 hybridized to Nanostring PanCancer IO 360 Panel code set (Nanostring), according to  
230 the recommendations of the manufacturer. After hybridization non-bound probes were

231 washed off and the RNA-probe complex was bound to the cartridge on the Nanostring  
232 Flex Prep Station according to manufacturing protocol. The cartridge was sealed and  
233 transferred to the Digital Analyzer for imaging.

234

### 235 *Statistical analysis*

236 Patient characteristics were descriptively reported using mean  $\pm$  SD, interquartile  
237 range (IQR) or frequencies (percentages). The Mann-Whitney test for continuous data,  
238 Fisher's exact test for categorical data and linear-by-linear association test for ordinal  
239 data were used to assess differences in patient characteristics between cohorts (training  
240 and validation) and between outcome groups (disease control vs PD). Differences were  
241 considered statistically significant if  $*P < 0.05$ ,  $**P < 0.01$ ,  $***P < 0.001$  or  $****P < 0.0001$ .

242 Genes in the Tumor Inflammation Signature (TIS) are normalized using a ratio of  
243 the expression value to the geometric mean of the housekeeper genes used only for the  
244 TIS signature and then followed by log<sub>2</sub> transformation. The TIS score was calculated as  
245 a weighted linear combination of the 18 gene expression values(29,35) (**Supplementary**  
246 **Table S1**). This analysis was performed by Nanostring as part of their intellectual  
247 property.

248 In the training cohort, univariate models and bivariate logistic models for DC 6m  
249 and DC 12m of treatment were constructed using CD8 TILs, IT-CD8 T cells, PD-1<sup>T</sup> TILs,  
250 CD3 TILs, TLS, TLS+LA, CD20<sup>+</sup> B cells, PD-L1 and TIS. The bivariate models included  
251 an interaction term. The bivariate logistic model produces for each patient a number  
252 between 0 and 1, reflecting the probability (according to the model) of patients reaching  
253 DC 6m or DC 12m. Calculation of the area under the receiver operating characteristic

254 (ROC) curve was used as a measure of discriminatory ability. The predictive performance  
255 of different individual and composite biomarkers on the same patient population was  
256 described in terms of sensitivity, specificity, positive predictive value (PPV) and negative  
257 predictive value (NPV) and compared using the McNemar test. A point on the ROC curve  
258 matching a sensitivity of 90% for DC 6m and 90% for DC 12m was selected to calculate  
259 corresponding specificity, NPV and PPV. We further aimed for an NPV of  $\geq 90\%$  and a  
260 specificity of  $\geq 50\%$ .

261 Two (closely related) non-parametric approaches were considered to obtain 90%  
262 sensitivity for predicting DC 6m and DC 12m from two biomarkers: by choosing a cut-  
263 point for each of the two biomarkers and declaring the patient positive (i.e. likely to  
264 respond to PD-1 blockade) when either at least one (first method) or both (second  
265 method) biomarker values were above their respective cut-point values. The specificities  
266 obtained were either equal or worse to those obtained by the parametric method  
267 described above (i.e. via logistic regression). Therefore, these non-parametric methods  
268 were not used in this study.

269 Four training models were selected with a cut-off that showed the highest  
270 specificity and NPV at the prespecified sensitivities for prediction of DC 6m and DC 12m.  
271 This cut-off was used to determine sensitivity, specificity, NPV and PPV in the validation  
272 cohort.

273

## 274 **Results**

### 275 *Biomarker characteristics and demographics*

276 To assess the predictive performance of multiple biomarker combinations we first  
277 analyzed 162 pretreatment tumor samples from 162 advanced stage NSCLC patients  
278 treated with nivolumab. In total we evaluated 9 biomarkers: (1) the total number of CD8  
279 TILs per mm<sup>2</sup>, (2) the percentage intra-tumoral (IT) CD8 T cells of total CD8 TILs, (3) the  
280 number of PD-1<sup>T</sup> TILs per mm<sup>2</sup> (4) the CD3-positive area per mm<sup>2</sup> to estimate the  
281 presence of CD3 TILs (5) the CD20-positive area per mm<sup>2</sup> to estimate the presence of B  
282 cells (6) the number of TLS and (7) the combined number of TLS and LA (referred as  
283 TLS+LA) per mm<sup>2</sup>, (8) the PD-L1 Tumor Proportion Score (TPS) and (9) the TIS score  
284 (NanoString) (**Fig. 1**). We could successfully assess CD8 TILs and IT-CD8 T cells in  
285 132/162 (81%), PD-1<sup>T</sup> TILs in 103/162 (64%), CD3 TILs, CD20<sup>+</sup> B cells, TLS and TLS+LA  
286 in 128/162 (79%), PD-L1 TPS in 134/162 (83%) and TIS in 68/162 (42%) samples (**Table**  
287 **1, Supplementary Fig. S1**). Sample exclusion criteria are shown per biomarker in  
288 **Supplementary Fig. S1**.

289 We randomized patients with  $\geq 2$  biomarker results available (n=135) in a training  
290 (n=55) and validation (n=80) cohort. This randomization was stratified for clinical benefit  
291 to ascertain that in both cohorts 1 in 3 patients reached DC 6m and 1 in 5 patients reached  
292 DC 12m, respectively. Since a limited number of patients with TIS scores (n=68) were  
293 available, these patients were randomly distributed proportionately (**Table 1,**  
294 **Supplementary Fig. S1**). For every patient the results per biomarker are shown in  
295 **Supplementary Table S1**. Demographic characteristics did not significantly differ among  
296 the training and validation cohort (**Table 2**).

297

298 *Accuracy of individual and composite biomarkers to predict DC at 6 months*

299           Next, we determined the most optimal cut-offs for each individual and composite  
300 biomarkers in the training cohort. We aimed for a sensitivity and NPV of  $\geq 90\%$  to minimize  
301 undertreatment and a specificity of at least 50% to identify those patients that are unlikely  
302 to respond to PD-1 blockade therapy and can potentially benefit from alternative  
303 treatments. Since not all tumor samples were evaluable for all nine biomarkers, the  
304 number of training samples ranged from 28 to 55 (**Table 1, Supplementary Fig. S1**). In  
305 total, 16 composite biomarkers and PD-1<sup>T</sup> and TIS as individual biomarkers reached  
306  $\geq 90\%$  sensitivity and  $\geq 50\%$  specificity (**Supplementary Table S2**). Interestingly, these  
307 include 7/8 (88%) possible combinations with PD-1<sup>T</sup> TILs and 5/8 (63%) with TIS  
308 (**Supplementary Table S2**). However, none of these combinations did significantly  
309 improve predictive accuracy compared to PD-1<sup>T</sup> TILs and TIS alone (**Supplementary**  
310 **Fig. S2A,B**) and were excluded from further analysis.

311           Next, we selected the four remaining biomarkers with the highest predictive  
312 performance for validation, being the combinations of CD8+IT-CD8 and CD3+IT-CD8, as  
313 well as PD-1<sup>T</sup> TILs and TIS alone, respectively (**Supplementary Table S2**). In the training  
314 cohort, both CD8+IT-CD8 and CD3+IT-CD8 had significantly higher probability scores in  
315 the DC 6m group (reflecting the probability of patients reaching DC 6m) compared to the  
316 PD group (CD8+IT-CD8,  $P < 0.0001$  and CD3+IT-CD8,  $P < 0.001$ ) (**Fig. 2A,B**). The area  
317 under the ROC curve (AUC) was 0.83 (95% CI 0.73-0.94) for CD8+IT-CD8, and 0.78  
318 (95% CI 0.65-0.92) for CD3+IT-CD8 (**Fig. 2C,D**). Cut-offs of 0.167 and 0.161,  
319 respectively, correlated to a sensitivity of 94% and 94%, specificity of 62% and 54%, NPV  
320 of 96% and 95% and PPV of 50% and 47% (**Table 3**).

321 Also, the PD-1<sup>T</sup> TIL numbers and TIS scores were significantly higher in the DC  
322 6m group than in the PD group (PD-1<sup>T</sup> TILs,  $P<0.001$  and TIS,  $P<0.01$ ) (**Supplementary**  
323 **Fig. S2C,D**). PD-1<sup>T</sup> TILs showed an AUC of 0.82 (95% CI 0.69-0.95) and TIS an AUC of  
324 0.81 (95% CI 0.65-0.98) (**Supplementary Fig. S2E,F**). For PD-1<sup>T</sup> TILs a cut-off of 90 per  
325 mm<sup>2</sup> was chosen, as this cut-off showed predictive value in a prior study(25). We  
326 observed a sensitivity of 92%, specificity of 67%, NPV of 95% and PPV of 52% (**Table**  
327 **3**). A score of 6.65 was chosen as optimal cut-off for TIS which correlated to a sensitivity  
328 of 100%, specificity of 55%, NPV of 100% and PPV of 47% (**Table 3**).

329 Next, we evaluated the predictive performance of the four selected biomarkers in  
330 the validation cohort. The number of validation samples with successful biomarker results  
331 ranged from 40 to 79 (**Table 1, Supplementary Fig. S1**). We observed that the predictive  
332 accuracy of CD8+IT-CD8 and CD3+IT-CD8 biomarkers was substantially lower  
333 compared to the training cohort. Specifically, probability scores in the DC 6m group did  
334 not significantly differ from scores in the PD group for CD8+IT-CD8 ( $P=0.08$ ) (**Fig. 2E**).  
335 For CD3+IT-CD8 this comparison was borderline significant ( $P=0.01$ ) (**Fig. 2F**). The AUC  
336 of the ROC curve was 0.62 (95% CI 0.50-0.75) for CD8+IT-CD8 and 0.68 (95% CI 0.55-  
337 0.80) for CD3+IT-CD8 (**Fig. 2C,D**). CD8+IT-CD8 reached a sensitivity of 64%, specificity  
338 of 56%, NPV of 76% and PPV of 41%. The predictive accuracy of CD3+IT-CD8 was  
339 higher than CD8+IT-CD8 but still lower than in the training cohort, reaching a sensitivity  
340 of 83%, specificity of 46%, NPV of 85% and PPV of 43% (**Table 3**).

341 The individual biomarkers in the validation cohort showed that PD-1<sup>T</sup> TIL numbers  
342 were significantly higher in the DC 6m group versus the PD group ( $P<0.01$ ), which was  
343 not observed for TIS scores ( $P=0.52$ ) (**Supplementary Fig. S2G,H**). The discriminatory

344 ability of PD-1<sup>T</sup> TILs was lower as in the training, but still reached an AUC of 0.72 (95%  
345 CI 0.57-0.87) (**Supplementary Fig. S2E**). TIS reached an AUC of 0.57 (95% CI 0.36-  
346 0.77) (**Supplementary Fig. S2F**). A cut-off of 90 PD-1<sup>T</sup> TILs per mm<sup>2</sup> correlated to a  
347 sensitivity of 72%, specificity of 74%, NPV of 86% and PPV of 54%. A TIS score of 6.65  
348 showed a comparable sensitivity (83%), NPV (84%) and PPV (37%) but lower specificity  
349 (39%) (**Table 3**). In summary, these results demonstrate that a combination of CD8+IT-  
350 CD8 and CD3+IT-CD8 did not improve predictive accuracy compared to PD-1<sup>T</sup> TILs and  
351 TIS alone. Furthermore, none of the selected biomarkers reached the prespecified  
352 performance criteria.

353

#### 354 *Accuracy of individual and composite biomarkers to predict DC at 12 months*

355       Approximately 70-80% of patients treated in 2<sup>nd</sup> line with PD-(L)1 blockade  
356 progress within 12 months(2–4). We previously demonstrated that PD-1<sup>T</sup> TILs could more  
357 effectively identify patients with DC 12m as compared to DC 6m, as well as a patient  
358 group without long-term benefit(25). We therefore also assessed the performance of all  
359 biomarkers to predict DC 12m. Similar to the DC 6m analysis, we determined the most  
360 optimal cut-offs for each of the composite and individual biomarkers to identify patients  
361 with DC 12m and with PD. Four patients in the training and nine patients in the validation  
362 experienced disease progression between 6 and 12 months, and were therefore included  
363 in the PD group in this analysis. 16 composite biomarkers reached ≥90% sensitivity and  
364 ≥50% specificity in the training cohort, as well as PD-1<sup>T</sup> TILs and TIS as individual  
365 biomarkers (**Supplementary Table S3**). We observed that 12/16 composite and 2/2  
366 individual biomarkers (PD-1<sup>T</sup> TILs and TIS), matched the 6-months endpoint with similar



367 accuracy (**Supplementary Table S2,3**). PD-1<sup>T</sup> TIL combinations did not significantly  
368 improve predictive accuracy compared to PD-1<sup>T</sup> TILs alone and were excluded from  
369 further analysis (**Supplementary Fig. S3A, Supplementary Table S3**). However, the  
370 combination of CD8 with TIS (CD8+TIS) showed an increase of 18% specificity compared  
371 to TIS alone. This combination was selected for further analysis, even though it did not  
372 reach statistical significance, possibly due to the low sample size ( $P=0.34$ )  
373 (**Supplementary Fig. S3B, Supplementary Table S3**). The four biomarkers with the  
374 highest predictive performance were selected for validation. 3/4 selected biomarkers,  
375 including PD-1<sup>T</sup> TILs, TIS and CD8+IT-CD8, matched the DC 6m selection. The fourth  
376 biomarker included the combination of CD8+TIS (**Supplementary Table S3**).

377 The probability scores for DC 12m and PD are shown per sample in  
378 **Supplementary Fig. S3C** (CD8+IT-CD8,  $P<0.001$ ) and **Supplementary Fig. S3D**  
379 (CD8+TIS,  $P<0.01$ ). The two composite biomarkers showed a high AUC of 0.85 (95% CI:  
380 0.73-0.96) (CD8+IT-CD8) and 0.91 (95% CI: 0.79-1.00) (CD8+TIS) in the training cohort  
381 (**Fig. 3A,B**). A cut-off of 0.122 and 0.124, respectively, was chosen as optimal cut-off  
382 (**Table 3**). PD-1<sup>T</sup> TIL numbers and TIS scores are shown in **Supplementary Fig S3E** and  
383 **F**. A cut-off of 90 PD-1<sup>T</sup> TILs per mm<sup>2</sup> and a TIS score of 6.65 demonstrated similar  
384 predictive accuracy as in the training for DC 6m (**Fig. 3C,D, Table 3**).

385 In the validation cohort, of the two composite biomarkers, only CD8+IT-CD8  
386 showed borderline significantly higher probability scores in the DC 12m group versus the  
387 PD group ( $P=0.03$ ) (**Supplementary Fig. S3G,H**). The ROCs yielded low AUCs (CD8+IT-  
388 CD8: 0.67 (95% CI: 0.53-0.81), CD8+TIS: 0.59 (95% CI 0.36-0.81)) (**Fig 3A,B**).  
389 Furthermore, the sensitivity (68% and 29%), specificity (57% and 68%), NPV (88% and

390 81%) and PPV (30% and 17%) did not meet the prespecified performance criteria (**Table**  
391 **3**).

392 PD-1<sup>T</sup> TIL numbers were significantly higher in patients with DC 12m versus PD  
393 ( $P<0.001$ ) (**Fig. 3E**). PD-1<sup>T</sup> TILs also demonstrated a consistently high AUC (0.80, 95%  
394 CI: 0.65-0.94) and high accuracy, reaching a sensitivity of 86%, specificity of 74%, NPV  
395 of 95% and PPV of 50% (**Fig. 3C, Table 3**). We observed an enrichment of patients with  
396 DC 12m in the  $\geq 90$  group and with PD in the  $< 90$  subgroup (**Fig. 3E**). TIS scores did not  
397 significantly differ between the two groups ( $P=0.31$ ) and showed a low AUC of 0.63 (95%  
398 CI 0.43-0.82) (**Fig. 3D,F**). However, a cut-off score of 6.65 reached a sensitivity of 100%,  
399 specificity of 39%, NPV of 100% and PPV of 26% (**Table 3**). These findings did not meet  
400 our  $\geq 50\%$  specificity criterium, but accurately identified all patients with DC 12m including  
401 39% of patients with PD (**Fig. 3F**). Taken together, PD-1<sup>T</sup> TILs and TIS as individual  
402 biomarkers showed higher predictive accuracy for DC 12m compared to the combination  
403 of CD8+IT-CD8 and CD8+TIS. Notably, PD-1<sup>T</sup> TILs alone was more accurate than TIS  
404 alone, as specificity and PPV were substantially higher.

405

## 406 **Discussion**

407 Since the introduction of PD-(L)1 blockade therapy, clinical outcome of advanced  
408 stage NSCLC has dramatically improved. Nevertheless, a subset of patients derive  
409 benefit from these treatments which consequently has led to overtreatment and  
410 unnecessarily side effects in many. In addition, health care systems deal with increasing  
411 costs. Several predictive biomarkers have been identified to support treatment decision  
412 making. Since different components in the TME can affect the tumor immune response

413 upon PD(L)1 blockade therapy, it is unlikely to find one single perfect biomarker. Based  
414 on the hypothesis that a predictive model should contain more than one biomarker; we  
415 here assess the predictive performance of biomarker combinations in an advanced stage  
416 NSCLC cohort treated with nivolumab. Our data showed that selected composite  
417 biomarkers did not improve predictive performance as compared to PD-1<sup>T</sup> TILs and TIS  
418 alone. At 6 months, none of the selected composite and individual biomarkers reached  
419 the prespecified performance criteria in the validation cohort. At 12 months, PD-1<sup>T</sup> TILs  
420 and TIS could identify patients with DC 12m with high accuracy. Patients without long-  
421 term benefit were more accurately identified by PD-1<sup>T</sup> TILs than TIS.

422         Whereas CD8 or CD3 TILs in combination with intratumoral localization of CD8 T  
423 cells were the most accurate composite biomarkers for DC 6m in the training cohort, we  
424 observed that discriminatory ability was low in the validation cohort. The presence and  
425 localization of TILs alone might not indicate that all T cells are in a state to recognize and  
426 eliminate the tumor(36,37). In the present study, this notion is supported by the high  
427 accuracy of PD-1<sup>T</sup> TILs to predict DC 12m, as these TILs have been identified as a distinct  
428 TIL subset with a high capacity of tumor recognition(24). The results are similar to our  
429 previous work because the majority of samples were re-used(25). Further refinement of  
430 this T cell population could contribute to the development of new markers or gene  
431 signatures, as recently been done by other studies(38–40). Since most of the biomarkers  
432 assessed in this study are related to antitumor immunity and are presumably correlated,  
433 PD-1<sup>T</sup> combinations did not improve specificity.

434         Previous studies have shown the predictive potential of combining CD8+PD-  
435 L1(22,34). However, in our training cohort, CD8+PD-L1 did not meet our performance

436 criteria, and as a result, this combination was not further evaluated. Noguchi et al.  
437 previously observed that PD-L1 expression on tumor cells is transient and dependent on  
438 the production of IFN $\gamma$  by TILs(41). Hence, variable tumor PD-L1 expression in training  
439 samples might have affected the predictive accuracy of PD-L1 alone and that of PD-L1  
440 combinations. Furthermore, this study is limited by the number of samples, in particularly  
441 for TIS assessment. Therefore, we restricted our evaluation to two-biomarker  
442 combinations instead of considering three or more. Studies involving a larger number of  
443 samples are essential to further validate our findings.

444 Our results for TIS are in line with other studies that demonstrated the predictive  
445 potential of this signature(29,42). Interestingly, TIS contains genes that are highly  
446 expressed in PD-1<sup>T</sup> TILs, such as LAG3 and TIGIT(24,29). A high number of PD-1<sup>T</sup> TILs  
447 or a high TIS score in pretreatment samples may serve as surrogate markers for a tumor's  
448 ability to undergo durable immune reactivation upon PD-1 blockade therapy. A PD-1<sup>T</sup>  
449 TILs or TIS combination with biomarkers reflecting distinct parts of the immune response  
450 could potentially improve predictive accuracy. For example, TMB can serve as a read-out  
451 for immunogenic neoantigens that arise from somatic mutations(15). TMB and PD-L1  
452 have previously been described as independent predictors for advanced NSCLC treated  
453 with PD-1 blockade and have shown improved performance when combined(32,33).  
454 Another suggestion is, in contrast, the presence of tumor-resident regulatory T cells (T<sub>reg</sub>)  
455 in the TME. T<sub>reg</sub> cells possess an immune-inhibitory function and high numbers are  
456 correlated to poor patient survival(43). A combination of TMB or T<sub>reg</sub> with either PD-1<sup>T</sup> or  
457 TIS could be further explored in future work.

458 In conclusion, this study showed that the biomarker combinations assessed here  
459 did not improve predictive performance when compared to PD-1<sup>T</sup> TILs and TIS alone.  
460 PD-1<sup>T</sup> TILs showed the highest predictive performance of all biomarkers, as patients with  
461 no long-term benefit were identified with high specificity and NPV.

462

### 463 **Acknowledgements**

464 We would like to thank the NKI-AVL Core Facility Molecular Pathology and Biobanking  
465 for supplying all IHC stainings used in this study, as well as biobank-related work and  
466 other laboratory support.

467

### 468 **References**

- 469 1. Reck M, Rodríguez-Abreu D, Robinson AG, Hui R, Csőszi T, Fülöp A, et al.  
470 Pembrolizumab versus Chemotherapy for PD-L1–Positive Non–Small-Cell Lung  
471 Cancer. *N Engl J Med*. 2016;375(19):1823–33. Available from:  
472 <http://www.nejm.org/doi/10.1056/NEJMoa1606774>
- 473 2. Borghaei H, Paz-Ares L, Horn L, Spigel DR, Steins M, Ready NE, et al.  
474 Nivolumab versus docetaxel in advanced nonsquamous non-small-cell lung  
475 cancer. *N Engl J Med*. 2015;373(17):1627–39.
- 476 3. Rittmeyer A, Barlesi F, Waterkamp D, Park K, Ciardiello F, von Pawel J, et al.  
477 Atezolizumab versus docetaxel in patients with previously treated non-small-cell  
478 lung cancer (OAK): a phase 3, open-label, multicentre randomised controlled trial.  
479 *Lancet*. 2017;389(10066):255–65.
- 480 4. Brahmer J, Reckamp KL, Baas P, Crinò L, Eberhardt WEE, Poddubskaya E, et al.

- 481 Nivolumab versus docetaxel in advanced squamous-cell non-small-cell lung  
482 cancer. *N Engl J Med*. 2015;373(2):123–35.
- 483 5. Garon EB, Rizvi NA, Hui R, Leighl N, Balmanoukian AS, Eder JP, et al.  
484 Pembrolizumab for the treatment of non-small-cell lung cancer. *N Engl J Med*.  
485 2015;372(21):2018–28.
- 486 6. Reck M, Rodríguez-Abreu D, Robinson AG, Hui R, Csoszi T, Fülöp A, et al.  
487 Updated analysis of KEYNOTE-024: Pembrolizumab versus platinum-based  
488 chemotherapy for advanced non–small-cell lung cancer with PD-L1 tumor  
489 proportion score of 50% or greater. *J Clin Oncol*. 2019;37(7):537–46.
- 490 7. Garon EB, Hellmann MD, Rizvi NA, Carcereny E, Leighl NB, Ahn MJ, et al. Five-  
491 year overall survival for patients with advanced non-small-cell lung cancer treated  
492 with pembrolizumab: Results from the phase I KEYNOTE-001 study. *J Clin Oncol*.  
493 2019;37(28):2518–27.
- 494 8. Peters S, Reck M, Smit EF, Mok T, Hellmann MD. How to make the best use of  
495 immunotherapy as first-line treatment of advanced/metastatic non-small-cell lung  
496 cancer. *Ann Oncol*. 2019;30(6):884–96.
- 497 9. Ilie M, Long-Mira E, Bence C, Butori C, Lassalle S, Bouhlel L, et al. Comparative  
498 study of the PD-L1 status between surgically resected specimens and matched  
499 biopsies of NSCLC patients reveal major discordances: A potential issue for anti-  
500 PD-L1 therapeutic strategies. *Ann Oncol*. 2016;27(1):147–53. Available from:  
501 <https://doi.org/10.1093/annonc/mdv489>
- 502 10. Gniadek TJ, Li QK, Tully E, Chatterjee S, Nimmagadda S, Gabrielson E.  
503 Heterogeneous expression of PD-L1 in pulmonary squamous cell carcinoma and

- 504 adenocarcinoma: Implications for assessment by small biopsy. *Mod Pathol.*  
505 2017;30(4):530–8.
- 506 11. Boothman AM, Scott M, Ratcliffe M, Whiteley J, Dennis PA, Wadsworth C, et al.  
507 Impact of Patient Characteristics, Prior Therapy, and Sample Type on Tumor Cell  
508 Programmed Cell Death Ligand 1 Expression in Patients with Advanced NSCLC  
509 Screened for the ATLANTIC Study. *J Thorac Oncol.* 2019;14(8):1390–9.
- 510 12. Hong L, Negrao M V., Dibaj SS, Chen R, Reuben A, Bohac JM, et al.  
511 Programmed Death-Ligand 1 Heterogeneity and Its Impact on Benefit From  
512 Immune Checkpoint Inhibitors in NSCLC. *J Thorac Oncol.* 2020;15(9):1449–59.  
513 Available from: <https://doi.org/10.1016/j.jtho.2020.04.026>
- 514 13. McLaughlin J, Han G, Schalper KA, Carvajal-Hausdorf D, Pelekanou V, Rehman  
515 J, et al. Quantitative assessment of the heterogeneity of PD-L1 expression in non-  
516 small-cell lung cancer. *JAMA Oncol.* 2016;2(1):46–54.
- 517 14. Butter R, A'T Hart N, Hooijer GKJ, Monkhorst K, Speel EJ, Theunissen P, et al.  
518 Multicentre study on the consistency of PD-L1 immunohistochemistry as  
519 predictive test for immunotherapy in non-small cell lung cancer. *J Clin Pathol.*  
520 2020;73(7):423–30.
- 521 15. Rizvi NA, Hellmann MD, Snyder A, Kvistborg P, Makarov V, Havel JJ, et al.  
522 Mutational landscape determines sensitivity to PD-1 blockade in non-small cell  
523 lung cancer. *Science (80- ).* 2015;348(6230):124–8.
- 524 16. Ready N, Hellmann MD, Awad MM, Otterson GA, Gutierrez M, Gainor JF, et al.  
525 First-line nivolumab plus ipilimumab in advanced non-small-cell lung cancer  
526 (CheckMate 568): Outcomes by programmed death ligand 1 and tumor mutational

- 527           burden as biomarkers. *J Clin Oncol*. 2019;37(12):992–1000.
- 528   17.   Sholl LM, Hirsch FR, Hwang D, Botling J, Lopez-Rios F, Bubendorf L, et al. The  
529           Promises and Challenges of Tumor Mutation Burden as an Immunotherapy  
530           Biomarker: A Perspective from the International Association for the Study of Lung  
531           Cancer Pathology Committee. *J Thorac Oncol*. 2020;15(9):1409–24.
- 532   18.   Tumeh PC, Harview CL, Yearley JH, Shintaku IP, Taylor EJM, Robert L, et al.  
533           PD-1 blockade induces responses by inhibiting adaptive immune resistance.  
534           *Nature*. 2014;515(7528):568–71.
- 535   19.   van der Leun AM, Thommen DS, Schumacher TN. CD8+ T cell states in human  
536           cancer: insights from single-cell analysis. *Nat Rev Cancer*. 2020;20(4):218–32.  
537           Available from: <http://dx.doi.org/10.1038/s41568-019-0235-4>
- 538   20.   Huang AC, Postow MA, Orlowski RJ, Mick R, Bengsch B, Manne S, et al. T-cell  
539           invigoration to tumour burden ratio associated with anti-PD-1 response. *Nature*.  
540           2017;545(7652):60–5.
- 541   21.   Le DT, Uram JN, Wang H, Bartlett BR, Kemberling H, Eyring AD, et al. PD-1  
542           Blockade in Tumors with Mismatch-Repair Deficiency. *N Engl J Med*.  
543           2015;372(26):2509–20.
- 544   22.   Fumet JD, Richard C, Ledys F, Klopfenstein Q, Joubert P, Routy B, et al.  
545           Prognostic and predictive role of CD8 and PD-L1 determination in lung tumor  
546           tissue of patients under anti-PD-1 therapy. *Br J Cancer*. 2018;119(8):950–60.  
547           Available from: <http://dx.doi.org/10.1038/s41416-018-0220-9>
- 548   23.   Hu-Lieskovan S, Lisberg A, Zaretsky JM, Grogan TR, Rizvi H, Wells DK, et al.  
549           Tumor characteristics associated with benefit from pembrolizumab in advanced



- 550 non–small cell lung cancer. *Clin Cancer Res.* 2019;25(16):5061–8.
- 551 24. Thommen DS, Koelzer VH, Herzig P, Roller A, Trefny M, Dimeloe S, et al. A  
552 transcriptionally and functionally distinct PD-1+ CD8+ T cell pool with predictive  
553 potential in non-small-cell lung cancer treated with pd-1 blockade. *Nat Med.*  
554 2018;24(7). Available from: <http://dx.doi.org/10.1038/s41591-018-0057-z>
- 555 25. Hummelink K, van der Noort V, Muller M, Schouten RD, Lalezari F, Peters D, et  
556 al. PD-1<sup>T</sup> TILs as a predictive biomarker for clinical benefit to PD-1 blockade in  
557 patients with advanced NSCLC. *Clin Cancer Res.* 2022;(10):1–14. Available from:  
558 <http://www.ncbi.nlm.nih.gov/pubmed/35852792>
- 559 26. Cabrita R, Lauss M, Sanna A, Donia M, Skaarup Larsen M, Mitra S, et al. Tertiary  
560 lymphoid structures improve immunotherapy and survival in melanoma. *Nature.*  
561 2020;(February). Available from: <http://www.ncbi.nlm.nih.gov/pubmed/31942071>
- 562 27. Helmink BA, Reddy SM, Gao J, Zhang S, Basar R, Thakur R, et al. B cells and  
563 tertiary lymphoid structures promote immunotherapy response. *Nature.*  
564 2020;(February). Available from: <http://www.ncbi.nlm.nih.gov/pubmed/31942075>
- 565 28. Petitprez F, de Reyniès A, Keung EZ, Chen TW-W, Sun C-M, Calderaro J, et al. B  
566 cells are associated with survival and immunotherapy response in sarcoma.  
567 *Nature.* 2020;577(June 2018). Available from:  
568 <http://www.ncbi.nlm.nih.gov/pubmed/31942077>
- 569 29. Ayers M, Ribas A, Mcclanahan TK, Ayers M, Lunceford J, Nebozhyn M, et al.  
570 blockade IFN- $\gamma$  – related mRNA profile predicts clinical response to PD-1  
571 blockade. *J Clin Invest.* 2017;127(8):2930–40.
- 572 30. Fehrenbacher L, Spira A, Ballinger M, Kowanzetz M, Vansteenkiste J, Mazieres J,

- 573 et al. Atezolizumab versus docetaxel for patients with previously treated non-  
574 small-cell lung cancer (POPLAR): A multicentre, open-label, phase 2 randomised  
575 controlled trial. *Lancet*. 2016;387(10030):1837–46. Available from:  
576 [http://dx.doi.org/10.1016/S0140-6736\(16\)00587-0](http://dx.doi.org/10.1016/S0140-6736(16)00587-0)
- 577 31. Higgs BW, Morehouse CA, Streicher K, Brohawn PZ, Pilataxi F, Gupta A, et al.  
578 Interferon gamma messenger RNA Signature in tumor biopsies predicts outcomes  
579 in patients with non–small cell lung carcinoma or urothelial cancer treated with  
580 durvalumab. *Clin Cancer Res*. 2018;24(16):3857–66.
- 581 32. Rizvi H, Sanchez-Vega F, La K, Chatila W, Jonsson P, Halpenny D, et al.  
582 Molecular determinants of response to anti-programmed cell death (PD)-1 and  
583 anti-programmed death-ligand 1 (PD-L1) blockade in patients with non-small-cell  
584 lung cancer profiled with targeted next-generation sequencing. *J Clin Oncol*.  
585 2018;36(7):633–41.
- 586 33. Hellmann MD, Nathanson T, Rizvi H, Creelan BC, Sanchez-Vega F, Ahuja A, et  
587 al. Genomic Features of Response to Combination Immunotherapy in Patients  
588 with Advanced Non-Small-Cell Lung Cancer. *Cancer Cell*. 2018;33(5):843-852.e4.
- 589 34. Althammer S, Tan TH, Spitzmüller A, Rognoni L, Wiestler T, Herz T, et al.  
590 Automated image analysis of NSCLC biopsies to predict response to anti-PD-L1  
591 therapy. *J Immunother Cancer*. 2019;7(1):1–12.
- 592 35. DanaHER P, Warren S, Lu R, Samayoa J, Sullivan A, Pekker I, et al. Pan-cancer  
593 adaptive immune resistance as defined by the Tumor Inflammation Signature  
594 (TIS): Results from The Cancer Genome Atlas (TCGA). *J Immunother Cancer*.  
595 2018;6(1):1–17.

- 596 36. Scheper W, Kelderman S, Fanchi LF, Linnemann C, Bendle G, de Rooij MAJ, et  
597 al. Low and variable tumor reactivity of the intratumoral TCR repertoire in human  
598 cancers. *Nat Med*. 2019;25(1):89–94. Available from:  
599 <http://dx.doi.org/10.1038/s41591-018-0266-5>
- 600 37. Simoni Y, Becht E, Fehlings M, Loh CY, Koo SL, Teng KWW, et al. Bystander  
601 CD8+ T cells are abundant and phenotypically distinct in human tumour infiltrates.  
602 *Nature*. 2018;557(7706):575–9.
- 603 38. Oliveira G, Stromhaug K, Klaeger S, Kula T, Frederick DT, Le PM, et al.  
604 Phenotype, specificity and avidity of antitumour CD8+ T cells in melanoma.  
605 *Nature*. 2021;596(7870):119–25. Available from:  
606 <http://dx.doi.org/10.1038/s41586-021-03704-y>
- 607 39. Caushi JX, Zhang J, Ji Z, Vaghasia A, Zhang B, Hsiue EHC, et al. Transcriptional  
608 programs of neoantigen-specific TIL in anti-PD-1-treated lung cancers. Vol. 596,  
609 *Nature*. Springer US; 2021. 126–132 p. Available from:  
610 <http://dx.doi.org/10.1038/s41586-021-03752-4>
- 611 40. Lowery FJ, Krishna S, Yossef R, Parikh NB, Chatani PD, Zacharakis N, et al.  
612 Molecular signatures of antitumor neoantigen-reactive T cells from metastatic  
613 human cancers. *Science*. 2022;884(February):eabl5447. Available from:  
614 <http://www.ncbi.nlm.nih.gov/pubmed/35113651>
- 615 41. Noguchi T, Ward JP, Gubin MM, Arthur CD, Lee SH, Hundal J, et al. Temporally  
616 distinct PD-L1 expression by tumor and host cells contributes to immune escape.  
617 *Cancer Immunol Res*. 2017;5(2):106–17.
- 618 42. Damotte D, Warren S, Arrondeau J, Boudou-Rouquette P, Mansuet-Lupo A, Biton

619 J, et al. The tumor inflammation signature (TIS) is associated with anti-PD-1  
620 treatment benefit in the CERTIM pan-cancer cohort. *J Transl Med.* 2019;17(1):1–  
621 10. Available from: <https://doi.org/10.1186/s12967-019-2100-3>  
622 43. Kim HJ, Cantor H. CD4 T-cell subsets and tumor immunity: the helpful and the  
623 not-so-helpful. *Cancer Immunol Res.* 2014;2(2):91–8.

624

## 625 **Figure legends**

626 **Figure 1. Immunohistochemical analysis of all biomarkers and digital mark-up**

627 **(A)** The left image shows an example of a CD8 immunohistochemical staining (IHC). The  
628 black square indicates the area that is shown in the central image. The right image shows  
629 the digital markup with CD8 TILs (in brown) and all other cells (in grey). **(B)** The left image  
630 shows the same example as shown in A. The black square indicates the area that is  
631 shown in the central image. The right image shows regional analysis of only intratumoral  
632 (IT) CD8 TILs. Stromal CD8 TILs are not quantified. Red lines indicate the tumor region.  
633 Red arrows indicate IT-CD8 TILs. White arrow indicates the area with stromal CD8 TILs.  
634 **(C)** The left image shows an example of a consecutive slide stained for PD-1 IHC. The  
635 black square indicates the area that is shown in the central image. The right image shows  
636 the digital markup with PD-1<sup>T</sup> TILs (in brown) and all other cells (in grey). **(D)** The left  
637 image shows an example of a consecutive slide double stained with CD20 and CD3 IHC.  
638 The black square indicates the area that is shown in the central image with CD20<sup>+</sup> B cells  
639 (in yellow) and CD3<sup>+</sup> T cells (in purple) localizing in a TLS. The right image shows the  
640 digital markup with CD20-positive areas highlighted by the intensity of the yellow staining  
641 (depicted as spectrum from yellow to red color). **(E)** Example of a consecutive slide

642 stained for PD-L1 IHC. The black square indicates the area that is shown in the right  
643 image. PD-L1 IHC slides were scored manually.

644

645 **Figure 2. Performance of selected composite and individual biomarkers to predict**  
646 **DC at 6 months in NSCLC patients treated with PD-1 blockade.**

647 **(A)** Probability scores of CD8+IT-CD8 in pretreatment samples from patients with disease  
648 control at 6 months (DC 6m) (n=16) and progressive disease (PD) (n=39) in the training  
649 cohort (n=55). Dashed line indicates a cut-off of 0.167. Medians, interquartile ranges and  
650 minimum/maximum shown in boxplots, \*\*\*\* $P < 0.0001$  by Mann Whitney U-test. **(B)**  
651 Probability scores of CD3+IT-CD8 in pretreatment samples from patients with DC 6m  
652 (n=16) and PD (n=37) in the training cohort (n=53). Dashed line indicates a cut-off of  
653 0.161. Medians, interquartile ranges and minimum/maximum shown in boxplots,  
654 \*\*\* $P < 0.001$  by Mann Whitney U-test. **(C)** Receiver operating characteristic (ROC) curve  
655 for predictive value of CD8+IT-CD8 for DC 6m in the training (n=55) (AUC 0.83, 95% CI:  
656 0.73-0.94) and validation cohort (n=77) (AUC 0.62, 95% CI: 0.50-0.75). **(D)** ROC curve  
657 for predictive value of CD3+IT-CD8 for DC 6m in the training (n=53) (AUC 0.78, 95% CI:  
658 0.65-0.91) and validation cohort (n=74) (AUC 0.68, 95% CI: 0.55-0.80). **(E)** Same plot as  
659 in **A** (CD8+IT-CD8) for patients with DC 6m (n=25) and PD (n=52) in the validation cohort  
660 (n=77),  $P = 0.08$ . **(F)** Same plot as in **B** (CD3+IT-CD8) for patients with DC 6m (n=24) and  
661 PD (n=50) in the validation cohort (n=74), \* $P = 0.02$ .

662

663 **Figure 3. Performance of selected composite and individual biomarkers to predict**  
664 **DC at 12 months in NSCLC patients treated with PD-1 blockade.**

665 **(A)** Receiver operating characteristic (ROC) curve for predictive value of CD8+IT-CD8  
666 for disease control at 12 months (DC 12m) in the training cohort (n=55) (AUC 0.85, 95%  
667 CI: 0.73-0.96) and validation cohort (n=77) (AUC 0.67, 95% CI: 0.53-0.81). **(B)** ROC curve  
668 for predictive value of CD8+TIS for DC 12m in the training cohort (n=28) (AUC 0.91, 95%  
669 CI: 0.79-1.00) and validation cohort (n=38) (AUC 0.59, 95% CI: 0.36-0.82). **(C)** ROC curve  
670 for predictive value of PD-1<sup>T</sup> TILs for DC 12m in the training cohort (n=42) (AUC 0.82,  
671 95% CI: 0.70-0.94) and validation cohort (n=61) (AUC 0.80, 95% CI: 0.65-0.94). **(D)** ROC  
672 curve for predictive value of TIS for DC 12m in the training cohort (n=28) (AUC 0.77, 95%  
673 CI: 0.58-0.96) and validation cohort (n=40) (AUC 0.63, 95% CI: 0.43-0.82). **(E)** PD-1<sup>T</sup>  
674 TILs per mm<sup>2</sup> in pretreatment samples from patients with DC 12m (n=14) and PD (n=47)  
675 in the validation cohort (n=61). Dashed line indicates a cut-off of 90 PD1<sup>T</sup> TILs per mm<sup>2</sup>.  
676 Medians, interquartile ranges and minimum/maximum shown in boxplots, \*\**P*<0.01 by  
677 Mann Whitney U-test. **(F)** TIS scores in pretreatment samples from patients with DC 12m  
678 (n=7) and PD (n=33) in the validation cohort (n=40). Dashed line indicates a cut-off score  
679 of 6.65. Medians, interquartile ranges and minimum/maximum shown in boxplots, *P*=0.31  
680 by Mann Whitney U-test.

681

682

683

684

685

686

687

688 Table 1. Total number of samples per biomarker in the training and validation cohort.

| Biomarkers                                             | Total samples (n) | Training (n) |                |         |                 |       | Validation (n) |                |        |                 |       |
|--------------------------------------------------------|-------------------|--------------|----------------|---------|-----------------|-------|----------------|----------------|--------|-----------------|-------|
|                                                        |                   | DC 6m        | PD (within 6m) | DC 12 m | PD (within 12m) | Total | DC 6m          | PD (within 6m) | DC 12m | PD (within 12m) | Total |
| CD8 TILs<br>IT-CD8 T cells                             | 132               | 16           | 39             | 12      | 43              | 55    | 25             | 52             | 16     | 61              | 77    |
| PD-1 <sup>T</sup> TILs                                 | 103               | 12           | 30             | 9       | 33              | 42    | 18             | 43             | 14     | 47              | 61    |
| CD3 TILs<br>CD20 <sup>+</sup> B cells<br>TLS<br>TLS+LA | 128               | 16           | 37             | 12      | 41              | 53    | 24             | 51             | 15     | 60              | 75    |
| PD-L1 TPS                                              | 134               | 16           | 39             | 12      | 43              | 55    | 25             | 54             | 16     | 63              | 79    |
| TIS                                                    | 68                | 8            | 20             | 6       | 22              | 28    | 12             | 28             | 7      | 33              | 40    |

690 Table 2. **Patient characteristics and treatment outcomes for training and validation**  
 691 **cohorts.** *P*-values were calculated by Mann-Whitney, Fisher exact or linear-by-linear  
 692 association tests. *S.d*, standard deviation; *IQR*, interquartile range; *PS*, Performance  
 693 Score, based on the European Cooperative Oncology group (ECOG) performance status  
 694 score. This is a score ranging from 0 to 5, where 0 indicates no symptoms, 1 indicates  
 695 mild symptoms and above 1 indicates greater disability; *LCNEC NSCLC* type, large cell  
 696 neuroendocrine carcinoma non-small cell lung cancer type; *NOS*, not otherwise specified;  
 697 *KRAS*, Kirsten Rat Sarcoma viral oncogene; *PD-L1*, programmed death ligand 1; *TPS*,  
 698 tumor proportion score; *CR*, complete response; *PR*, partial response; *SD*, stable  
 699 disease; *PD*, progressive disease; *DC*, disease control.

|                            |                | Training cohort | Validation cohort |
|----------------------------|----------------|-----------------|-------------------|
|                            | <i>p-value</i> | n=55            | n=80              |
| Sex                        | 1.00           |                 |                   |
| Male, no.(%)               |                | 30 (55%)        | 44 (55%)          |
| Female, no.(%)             |                | 25 (45%)        | 36 (45%)          |
| Age (years), mean (SD)     | 0.20           | 62 (10.1)       | 65 (7.5)          |
| Smoking (never/ex/current) | 0.64           | 5/44/6          | 12/51/17          |
| Pack years, median (IQR)   | 0.90           | 29 (20)         | 30 (28)           |
| PS, no. (%)                | 0.46           |                 |                   |
| 0                          |                | 16 (29%)        | 16 (20%)          |
| 1                          |                | 29 (53%)        | 50 (62%)          |
| ≥2                         |                | 10 (18%)        | 14 (18%)          |
| Pathology, no.(%)          | 0.19           |                 |                   |
| Adeno                      |                | 35 (64%)        | 50 (62%)          |
| Squamous                   |                | 10 (18%)        | 20 (25%)          |
| LCNEC, NSCLC-type          |                | 0 (0%)          | 3 (4%)            |
| NSCLC, NOS                 |                | 10 (18%)        | 7 (9%)            |
| Mutations, no. (%)         | 0.86           |                 |                   |



|                           |      |          |          |
|---------------------------|------|----------|----------|
| KRAS positive             |      | 19 (35%) | 30 (38%) |
|                           |      |          |          |
| PD-L1 TPS, no. (%)        |      |          |          |
| Negative <1%              | 1.00 | 30 (55%) | 43 (54%) |
| Positive ≥1%              |      | 25 (45%) | 36 (45%) |
|                           |      |          |          |
| Negative <50%             | 0.66 | 43 (78%) | 65 (81%) |
| Positive >50%             |      | 12 (22%) | 14 (18%) |
| Unknown                   |      | 0 (0%)   | 1 (1%)   |
|                           |      |          |          |
| Brain metastases, no. (%) | 0.67 | 13 (24%) | 16 (20%) |
|                           |      |          |          |
| Line of treatment, no (%) | 0.63 |          |          |
| 1                         |      | 0 (0%)   | 1 (1%)   |
| 2                         |      | 42 (76%) | 56 (70%) |
| >2                        |      | 13 (24%) | 23 (29%) |
|                           |      |          |          |
| Best Overall Response     | 0.62 |          |          |
| CR/PR                     |      | 11 (20%) | 15 (19%) |
| SD                        |      | 5 (9%)   | 16 (20%) |
| SD (PFS <6 months)        |      | 0 (0%)   | 6 (7%)   |
| SD (PFS ≥6 months)        |      | 5 (9%)   | 10 (13%) |
| PD                        |      | 39 (71%) | 49 (61%) |
|                           |      |          |          |
| DC                        |      |          |          |
| at 6 months               | 0.85 | 16 (29%) | 25 (31%) |
| at 12 months              | 0.83 | 12 (22%) | 16 (20%) |

700

701

702

703

704

705

706

707

708

709 Table 3. Predictive accuracy of selected individual and composite biomarkers, summary of training and  
 710 validation results

| Clinical outcome    | Bio-marker             | Predictor                                                                                             | Cut-off | Samples (n) | Training         |             |             |      |     | Validation  |                  |             |             |      |     |
|---------------------|------------------------|-------------------------------------------------------------------------------------------------------|---------|-------------|------------------|-------------|-------------|------|-----|-------------|------------------|-------------|-------------|------|-----|
|                     |                        |                                                                                                       |         |             | AUC (95% CI)     | Sensitivity | Specificity | NPV  | PPV | Samples (n) | AUC (95%-CI)     | Sensitivity | Specificity | NPV  | PPV |
| <b>DC 6 months</b>  | PD-1 <sup>T</sup> TILs |                                                                                                       | 90      | 42          | 0.82 (0.69-0.95) | 92%         | 67%         | 95%  | 52% | 61          | 0.72 (0.57-0.87) | 72%         | 74%         | 86%  | 54% |
|                     | TIS                    |                                                                                                       | 6.65    | 28          | 0.81 (0.65-0.98) | 100%        | 55%         | 100% | 47% | 40          | 0.57 (0.36-0.77) | 83%         | 39%         | 84%  | 37% |
|                     | CD8+ IT-CD-8           | probability for DC = 1 / (1 - exp (-3.5749 + 0.0031 * CD8 + 0.043 * IT-CD8))                          | 0.167   | 55          | 0.83 (0.73-0.94) | 94%         | 62%         | 96%  | 50% | 77          | 0.62 (0.50-0.75) | 64%         | 56%         | 76%  | 41% |
|                     | CD3+ IT-CD-8           | probability for DC = 1 / (1 - exp (-2.3821 + 0.0806 * CD3 + 0.0175 * IT-CD8 + 0.0069 * CD3 * IT-CD8)) | 0.161   | 53          | 0.78 (0.65-0.91) | 94%         | 54%         | 95%  | 47% | 74          | 0.68 (0.55-0.80) | 83%         | 46%         | 85%  | 43% |
| <b>DC 12 months</b> | PD-1 <sup>T</sup> TILs |                                                                                                       | 90      | 42          | 0.82 (0.70-0.94) | 100%        | 64%         | 100% | 43% | 61          | 0.80 (0.65-0.94) | 86%         | 74%         | 95%  | 50% |
|                     | TIS                    |                                                                                                       | 6.65    | 28          | 0.77 (0.58-0.96) | 100%        | 50%         | 100% | 35% | 40          | 0.63 (0.43-0.82) | 100%        | 39%         | 100% | 26% |
|                     | CD8+ IT-CD-8           | probability for DC = 1 / (1 - exp (-4.0644 + 0.003 * CD8 + 0.0436 * IT-CD8))                          | 0.122   | 55          | 0.85 (0.73-0.96) | 92%         | 63%         | 96%  | 41% | 77          | 0.67 (0.53-0.81) | 68%         | 57%         | 88%  | 30% |
|                     | CD8+ TIS               | probability for DC = 1 / (1 - exp (-5.7952 + 0.0224 * CD8 + 0.2346 * TIS + -0.0021 * CD8 * TIS))      | 0.124   | 28          | 0.91 (0.79-1.00) | 100%        | 68%         | 100% | 46% | 38          | 0.59 (0.36-0.82) | 29%         | 68%         | 81%  | 17% |

711

712

Figure 1

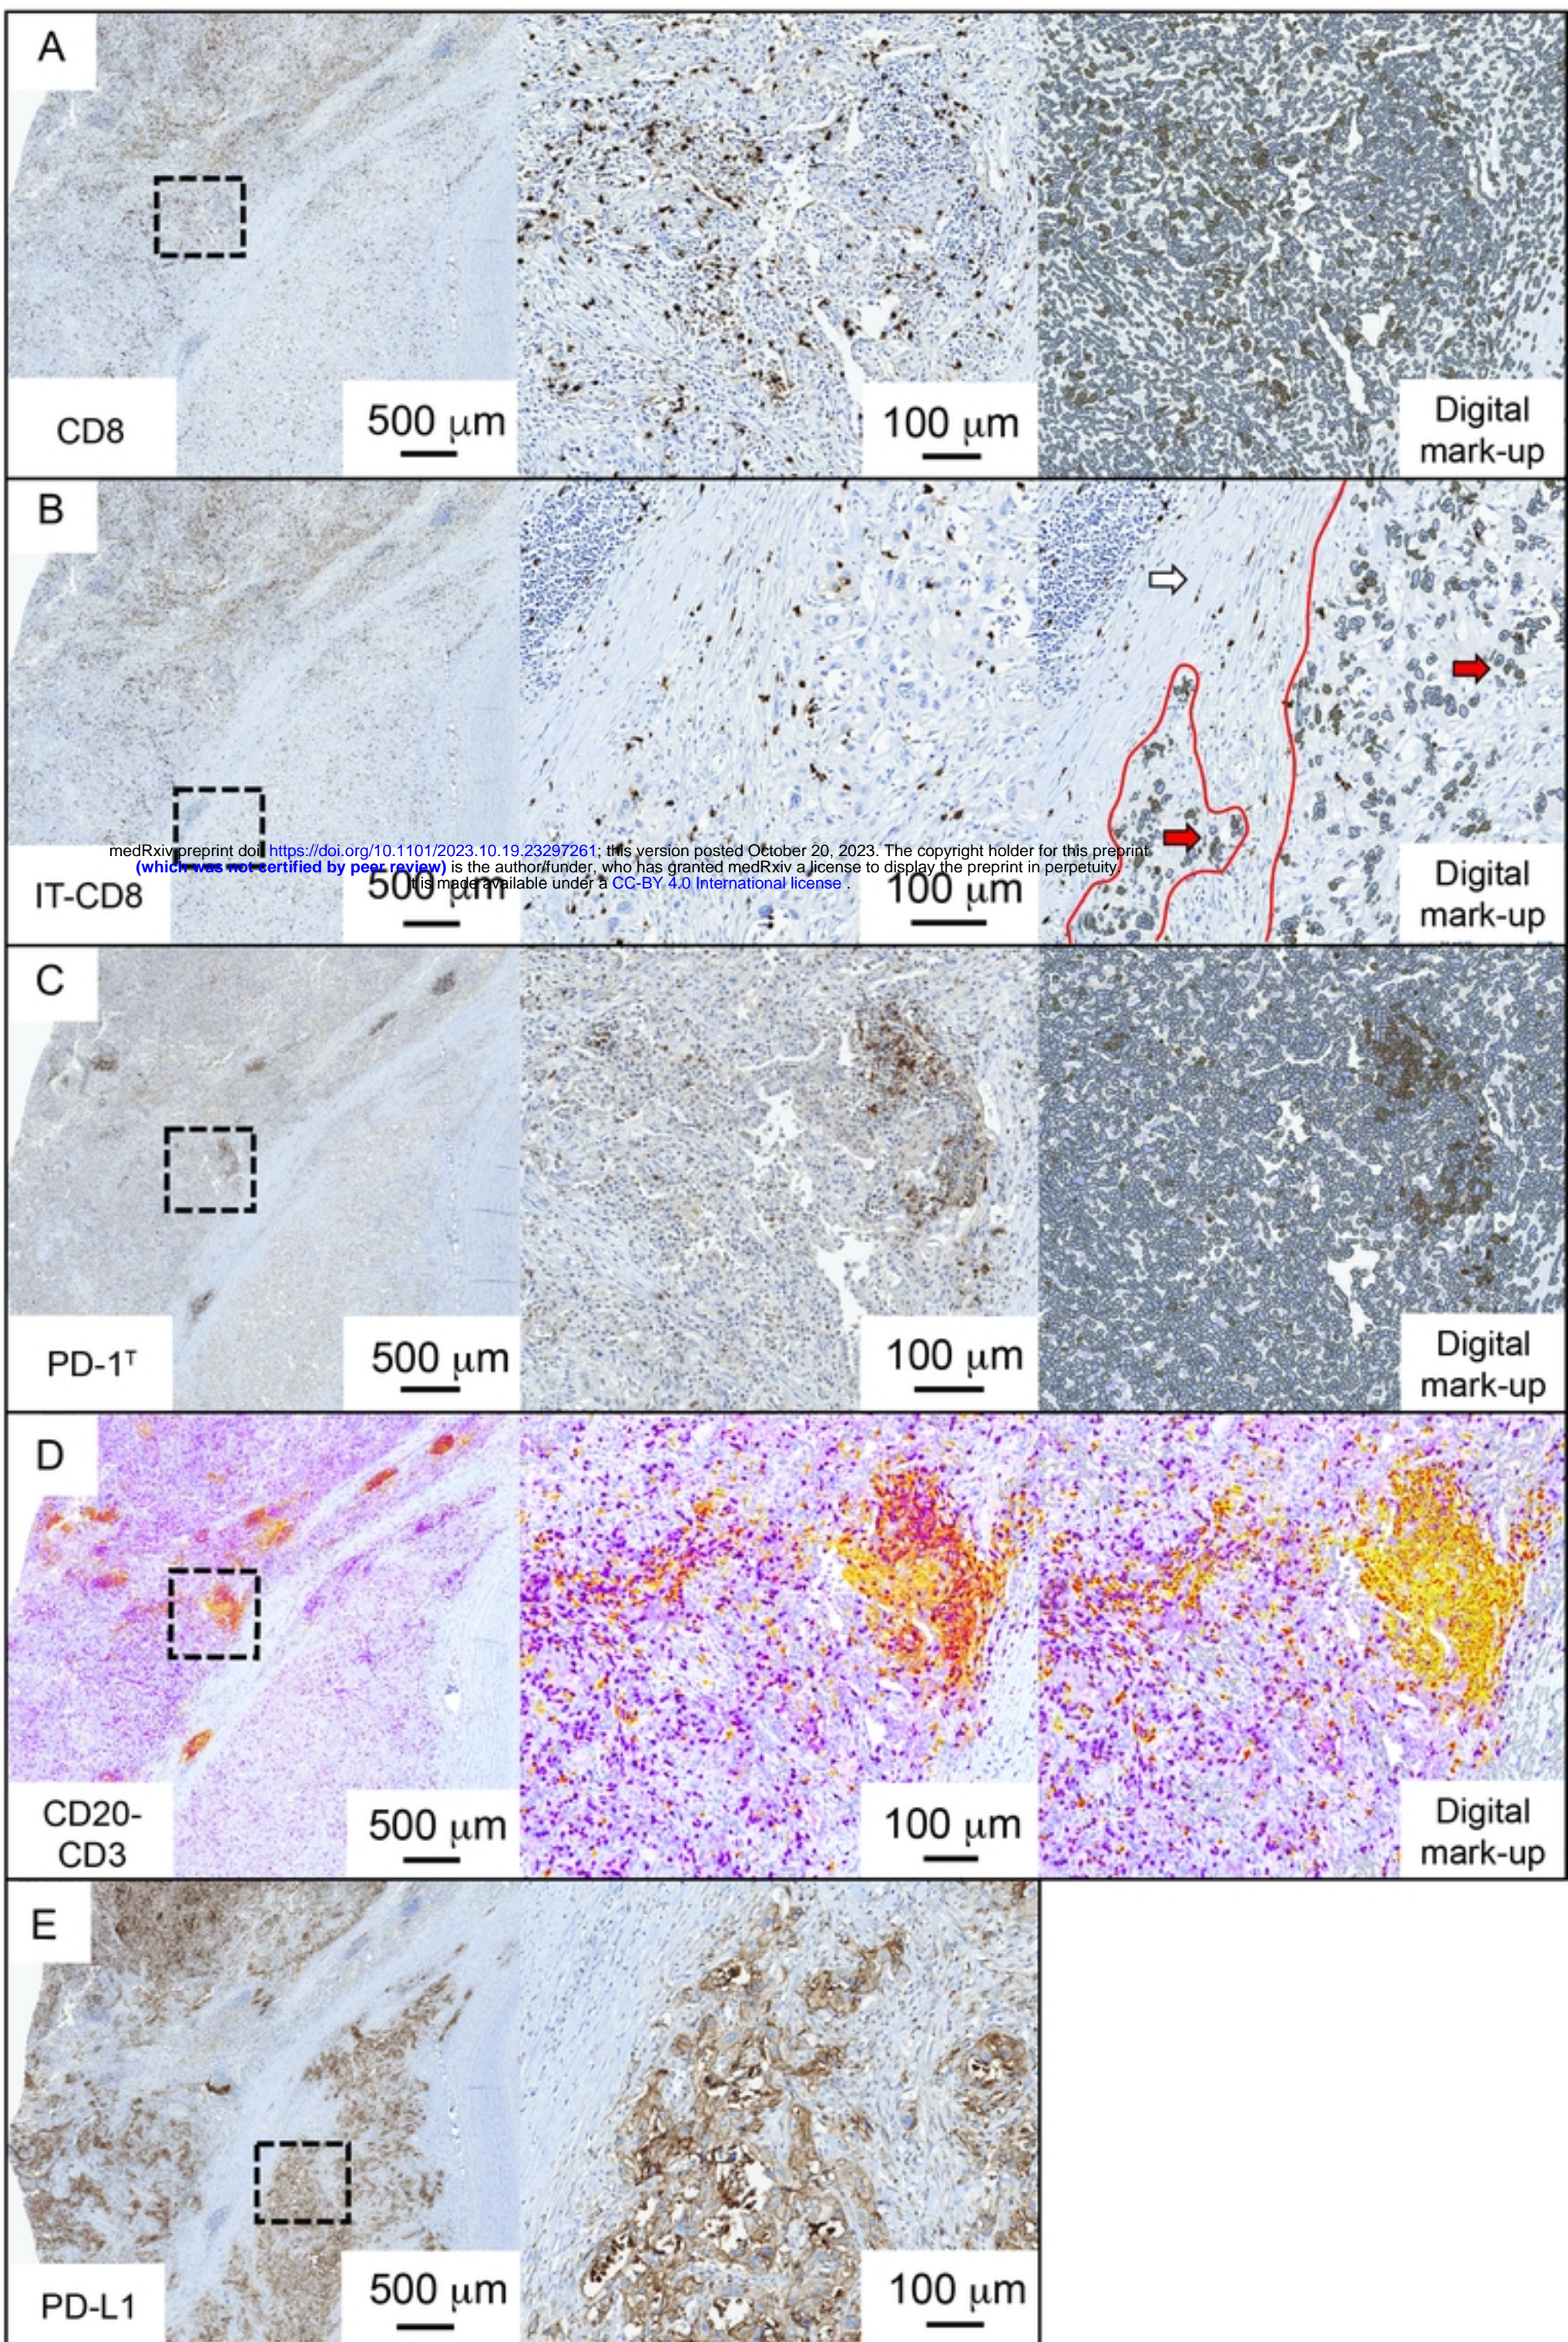

Figure 1

Figure 2

A

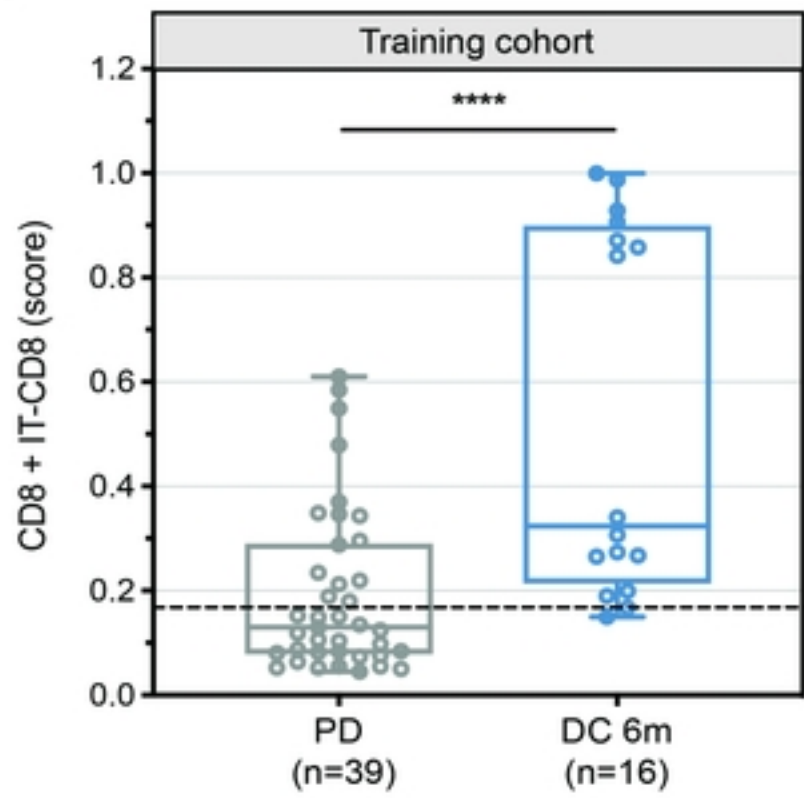

B

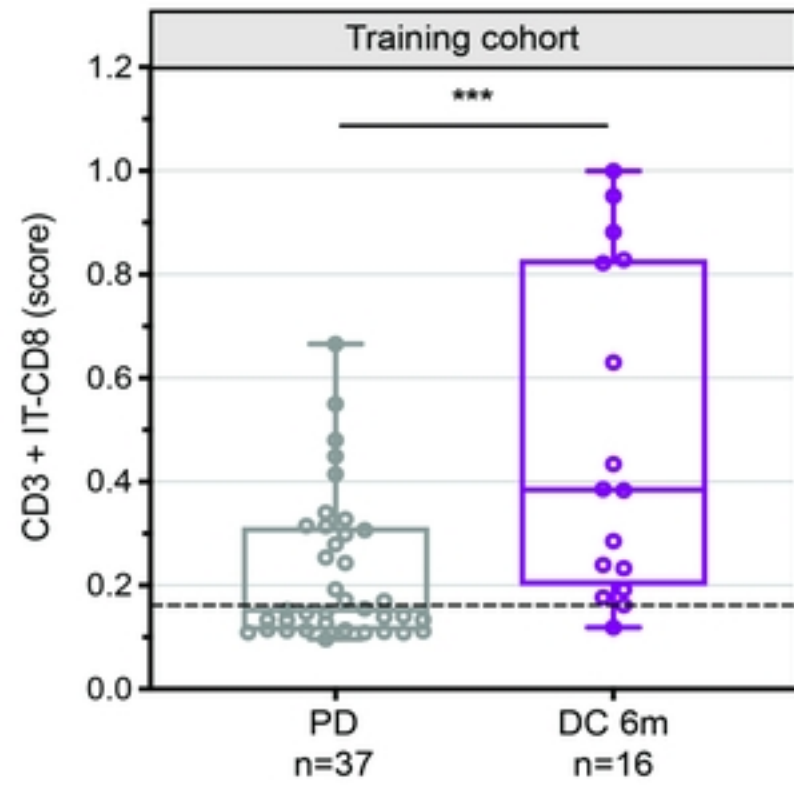

medRxiv preprint doi: <https://doi.org/10.1101/2023.10.19.23297261>; this version posted October 20, 2023. The copyright holder for this preprint (which was not certified by peer review) is the author/funder, who has granted medRxiv a license to display the preprint in perpetuity. It is made available under a [CC-BY 4.0 International license](https://creativecommons.org/licenses/by/4.0/).

C

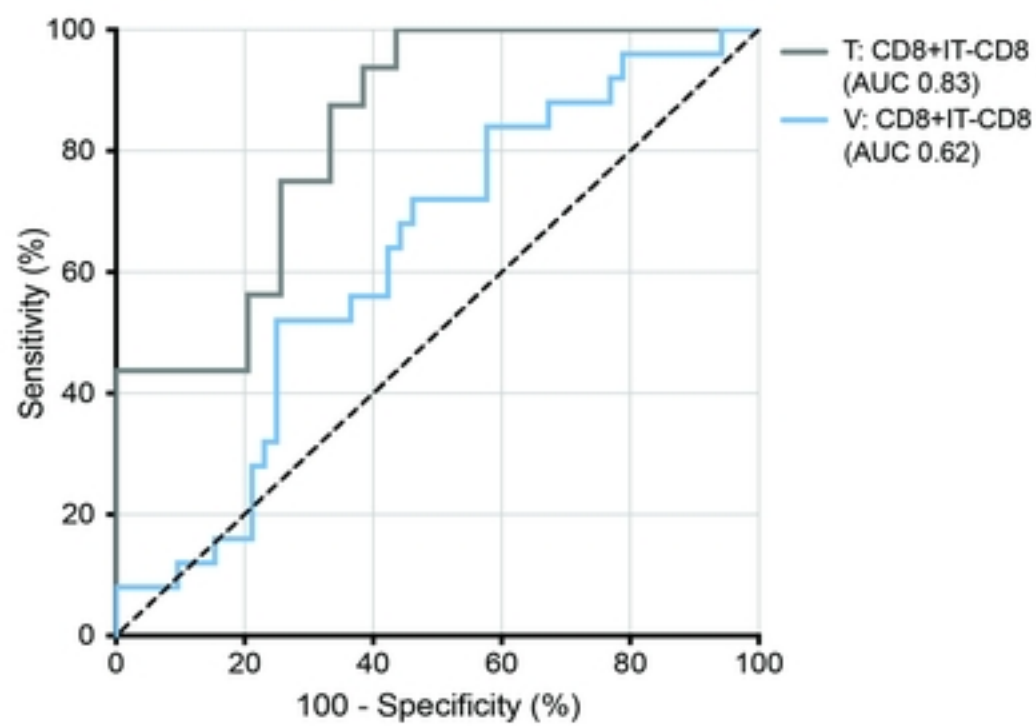

D

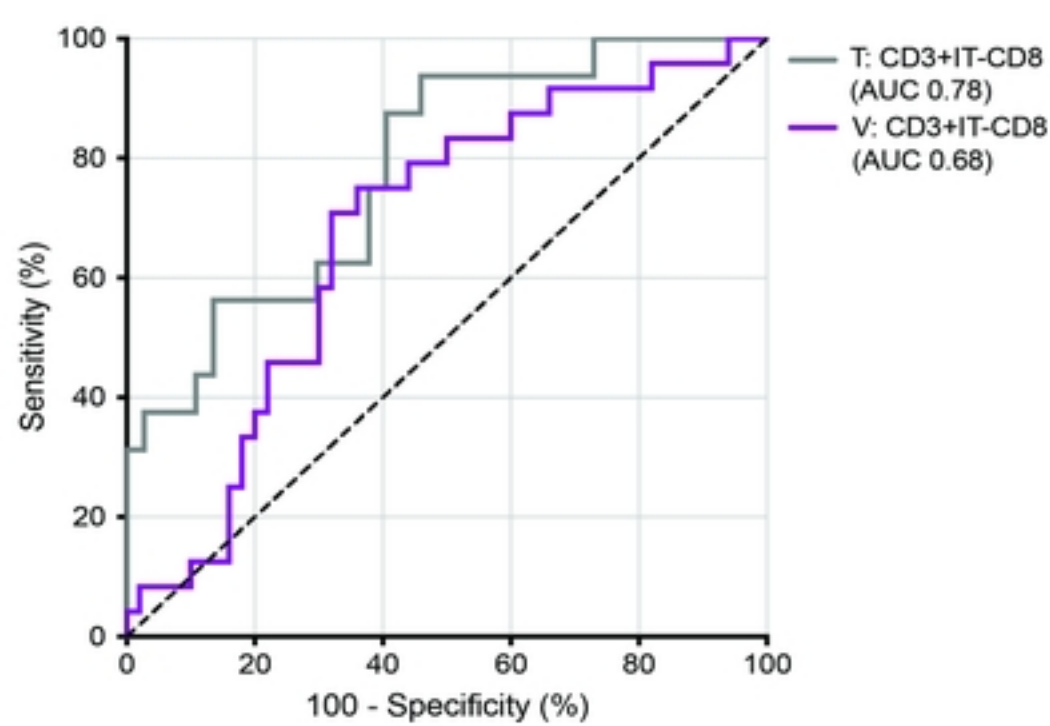

E

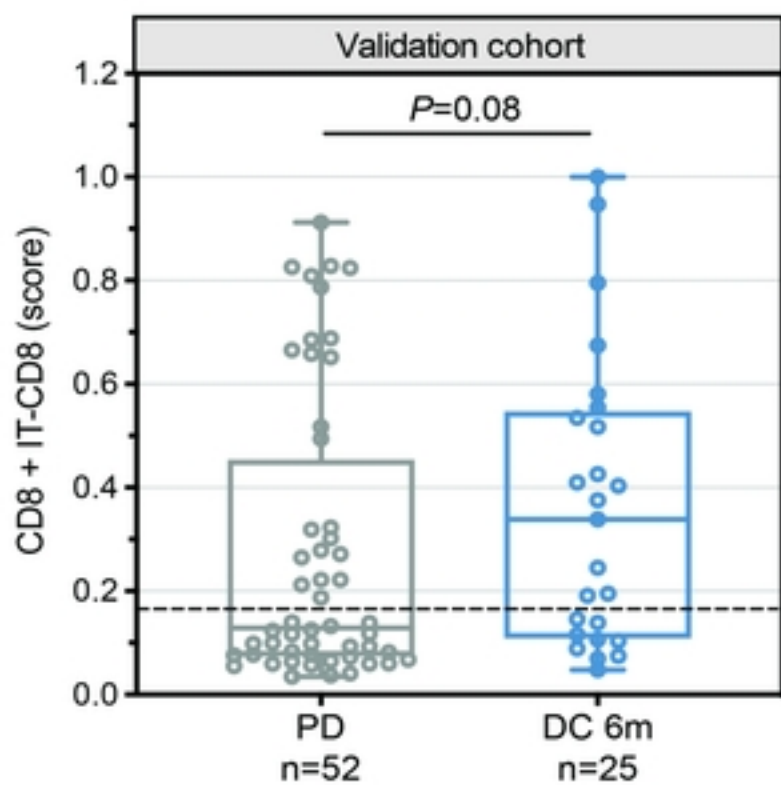

F

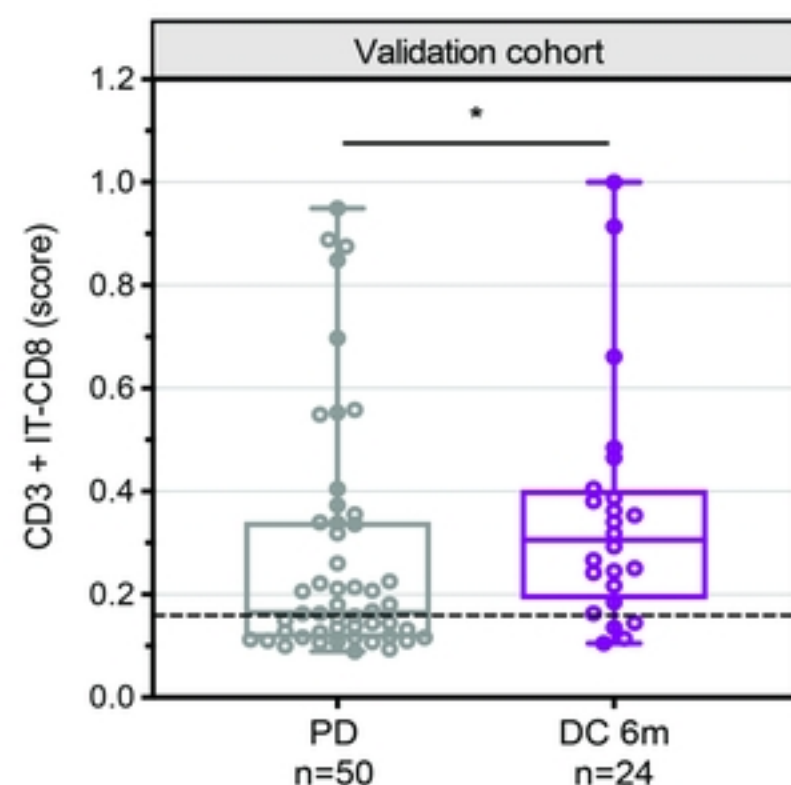

Figure 2

Figure 3

A

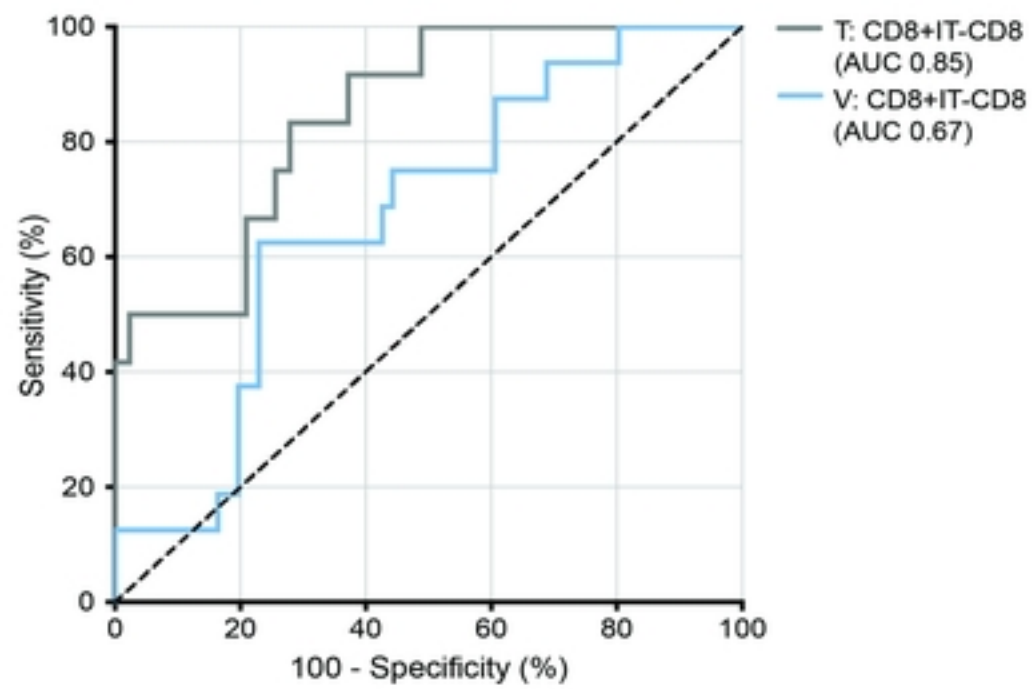

B

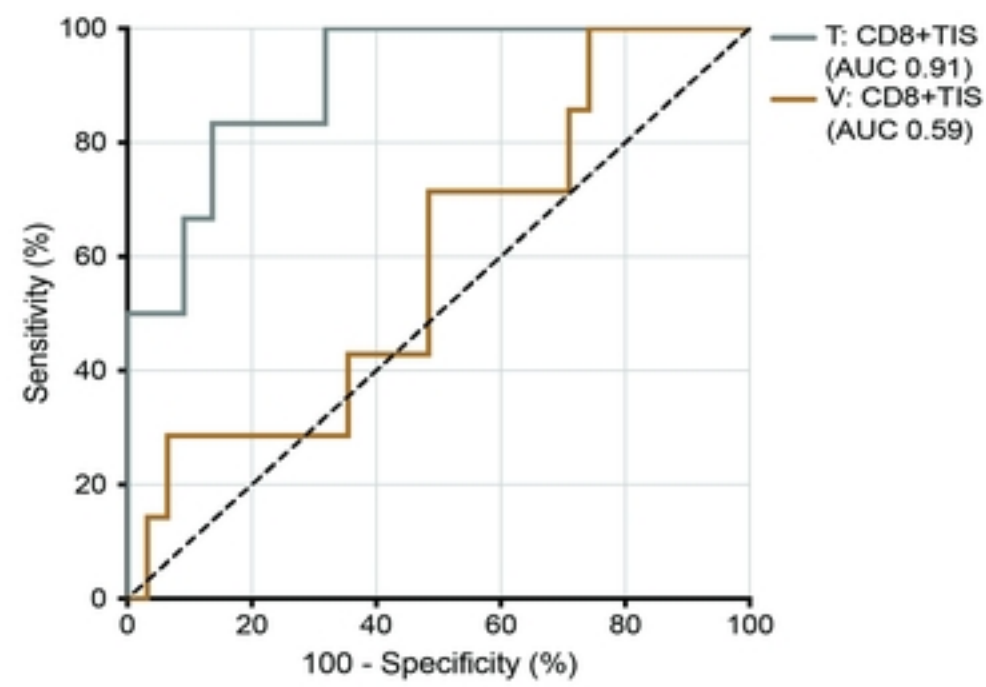

medRxiv preprint doi: <https://doi.org/10.1101/2023.10.19.23297261>; this version posted October 20, 2023. The copyright holder for this preprint (which was not certified by peer review) is the author/funder, who has granted medRxiv a license to display the preprint in perpetuity. It is made available under a [CC-BY 4.0 International license](https://creativecommons.org/licenses/by/4.0/).

C

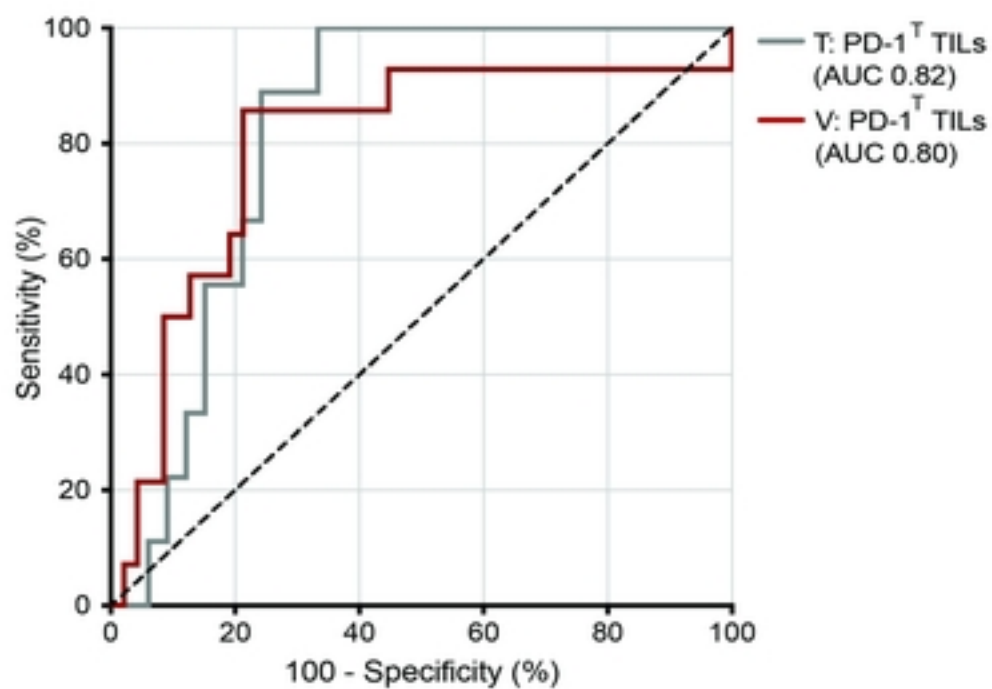

D

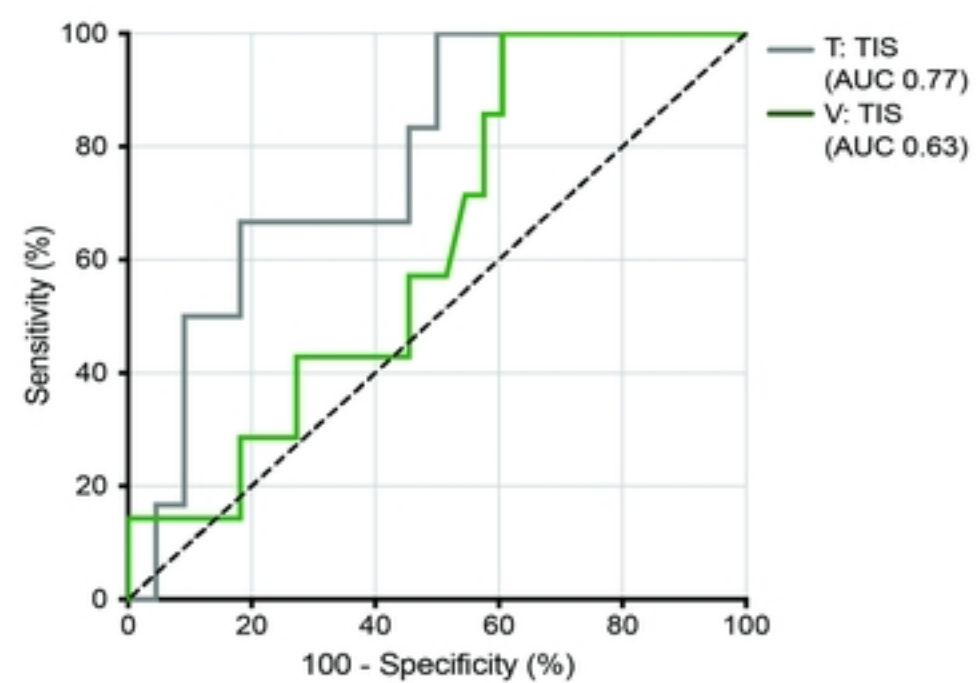

E

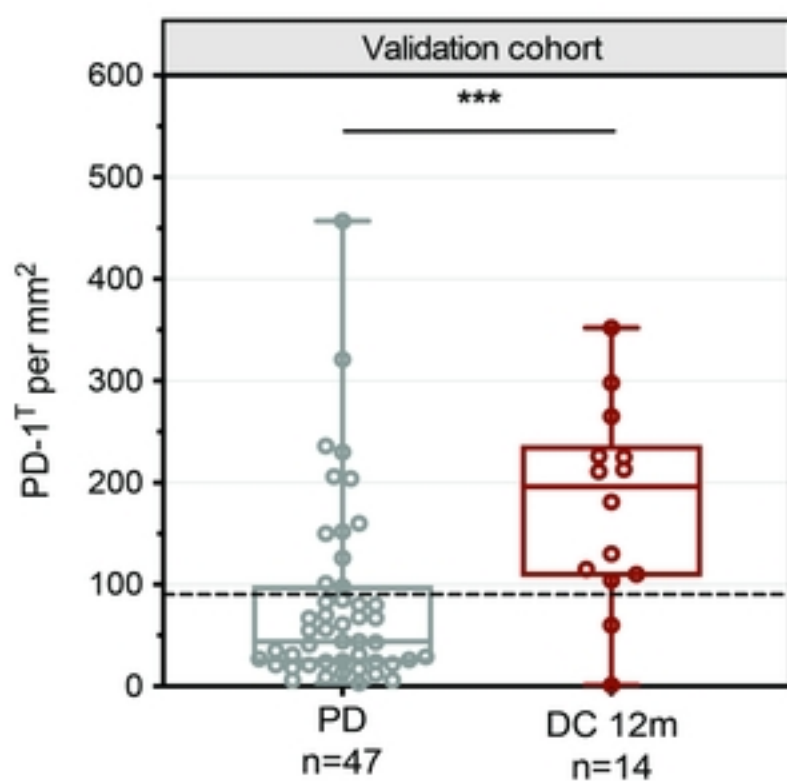

F

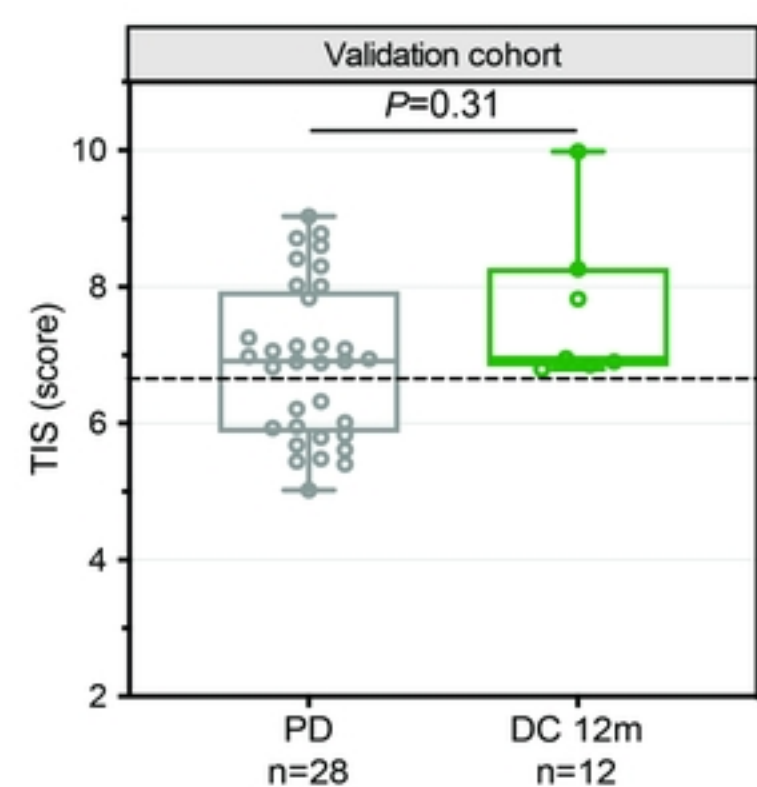

Figure 3
